# Supplementary material for: Clinico-genomic study reveals association of dengue virus genome high frequency mutations with dengue disease severity
Source: Springer Nature journal article supplement (doi:10.1038/s41598-025-00462-z), 2025-05-28
Supplement: MOESM1 [file 41598_2025_462_MOESM1_ESM.pdf]

A 0-20 % (Cluster E)

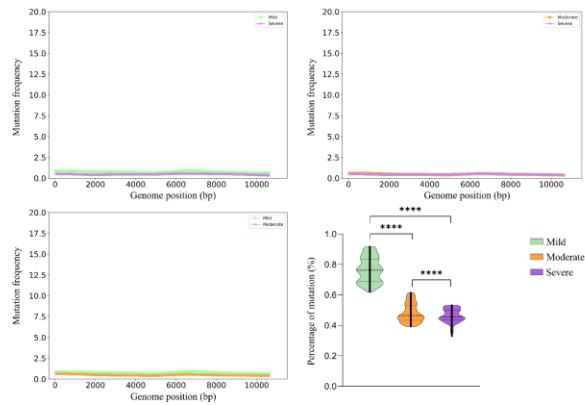

C 40-60 % (Cluster C)

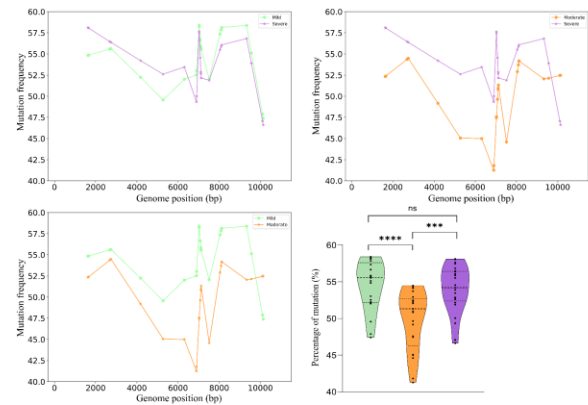

B 20-40 % (Cluster D)

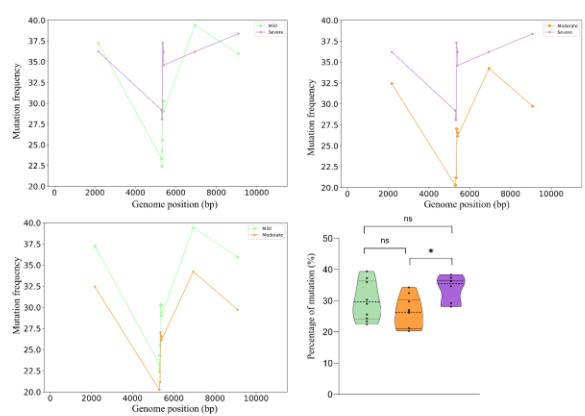

D 60-80 % (Cluster B)

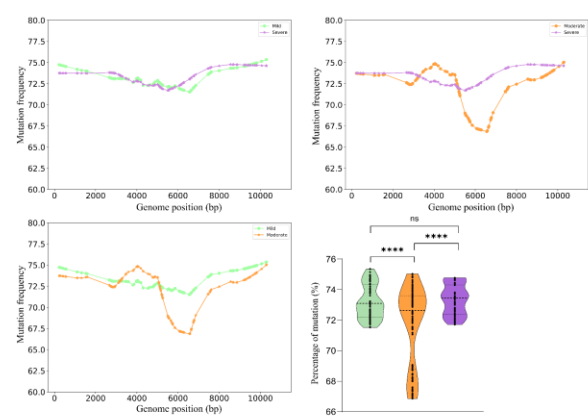

**Supplementary Figure 1:** (A-D) Line plots showing mutation frequency across the DENV-2. genome for Cluster B-E and Violin plot showing significant differences between percentage of mutation and severity cohort.

### A) Cluster - E (0-20)

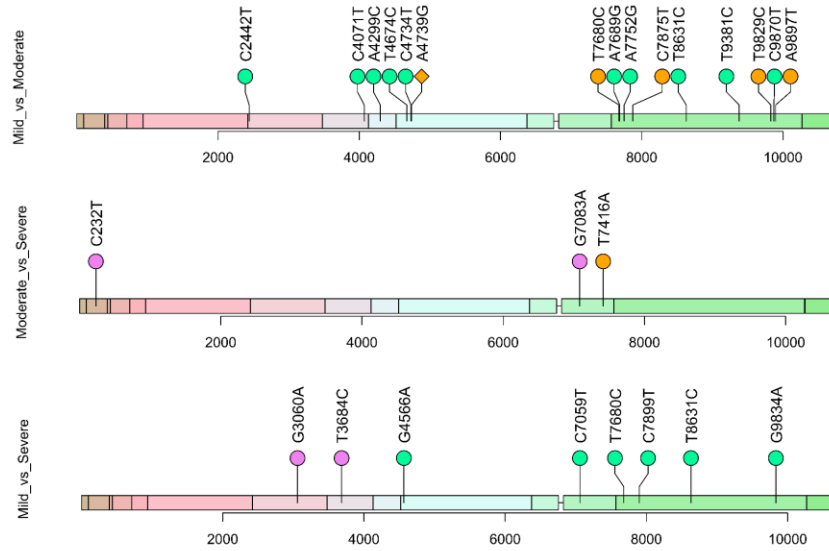

### B) Cluster - D (20-40)

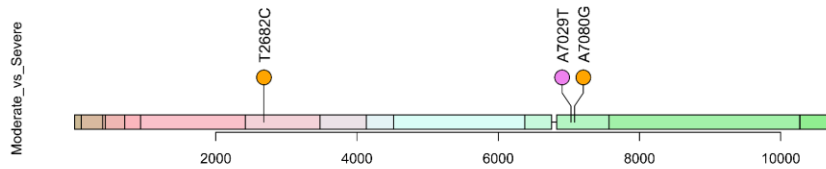

### C) Cluster - C (40-60)

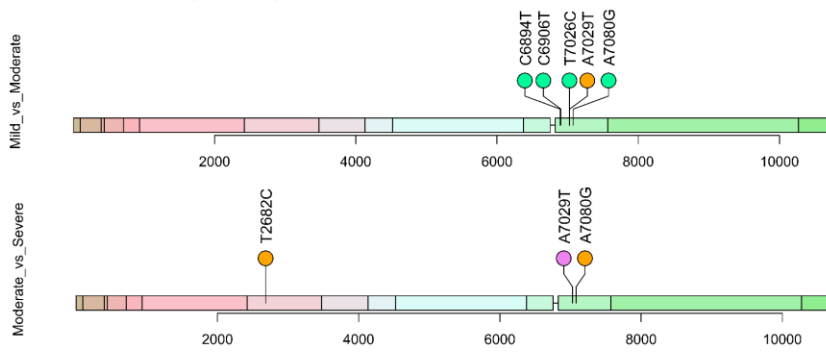

### D) Cluster - B (60-80)

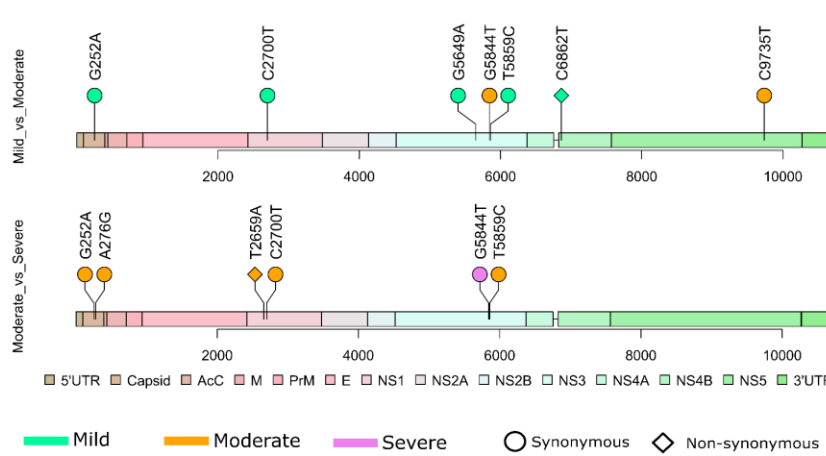

**Supplementary Figure 2:** (A-D) Lollipop plot representing significant synonymous and non-synonymous mutations between severity groups.

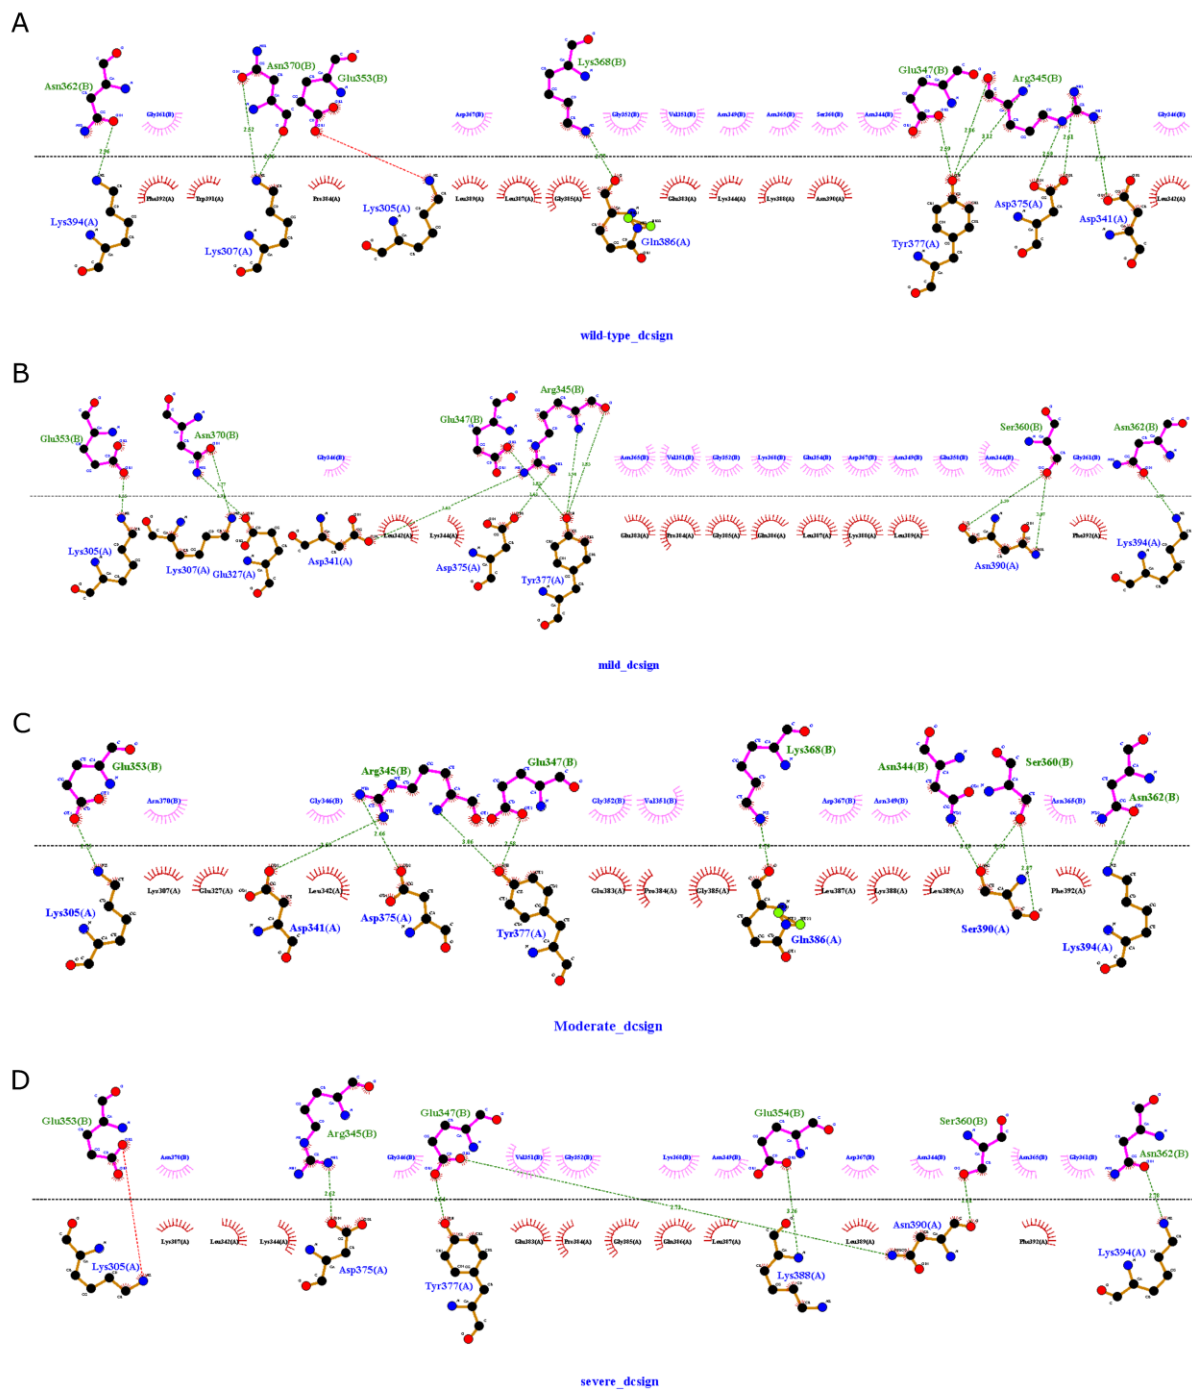

**Supplementary Figure 3: (A-D) Interaction plot between E-protein and DC-SIGN.**
